# Supplementary material for: Soluble Plasma Proteins of Tumor Necrosis Factor and Immunoglobulin Superfamilies Reveal New Insights into Immune Regulation in People with HIV and Opioid Use Disorder
Source: MDPI journal article supplement (doi:10.3390/vaccines12050520), 2024-05-09
Supplement: s1 [file s1]

## Suppl Table 1

**Table S1: Checkpoint multiplex protein panel**

| Checkpoint multiplex protein panel 1                                                                                                                                                                                                                                                                                                                                                                                                                                                                                                                                                                                                                                                                                                                                                                                                                                                                                                                                                                        | Checkpoint multiplex protein panel 2                                                                                                                                                                                                                                                                                                                                                                                                                                                                                                                                                                                                                                                                                                                                                                                                                                                                                                                                                                                                                                                                                                                                                                                                                                                                                                                                                                                                                                                    |
|-------------------------------------------------------------------------------------------------------------------------------------------------------------------------------------------------------------------------------------------------------------------------------------------------------------------------------------------------------------------------------------------------------------------------------------------------------------------------------------------------------------------------------------------------------------------------------------------------------------------------------------------------------------------------------------------------------------------------------------------------------------------------------------------------------------------------------------------------------------------------------------------------------------------------------------------------------------------------------------------------------------|-----------------------------------------------------------------------------------------------------------------------------------------------------------------------------------------------------------------------------------------------------------------------------------------------------------------------------------------------------------------------------------------------------------------------------------------------------------------------------------------------------------------------------------------------------------------------------------------------------------------------------------------------------------------------------------------------------------------------------------------------------------------------------------------------------------------------------------------------------------------------------------------------------------------------------------------------------------------------------------------------------------------------------------------------------------------------------------------------------------------------------------------------------------------------------------------------------------------------------------------------------------------------------------------------------------------------------------------------------------------------------------------------------------------------------------------------------------------------------------------|
| <ol style="list-style-type: none"> <li>1. BTLA (B- and T-lymphocyte attenuator)*</li> <li>2. CD27 (Cluster of differentiation 27)#</li> <li>3. CD28 (Cluster of differentiation 28)*</li> <li>4. CD40 (Cluster of differentiation 40)#</li> <li>5. CD80/B7-1 (Cluster of differentiation 80/B7-1) *</li> <li>6. CD86/B7-2 (Cluster of differentiation 86/B7-2)*</li> <li>7. CTLA-4 (cytotoxic T-lymphocyte-associated protein 4)*</li> <li>8. GITRL (Ligand for receptor TNFRSF18/AITR/GITR)#</li> <li>9. GITR (Glucocorticoid-induced TNFR-related protein) #</li> <li>10. HVEM (Herpesvirus entry mediator) #</li> <li>11. ICOS (Inducible T-cell costimulator)*</li> <li>12. LAG-3 (Lymphocyte-activation gene 3)*</li> <li>13. PD-L1 (Programmed death-ligand 1)*</li> <li>14. PD-L2 (Programmed death-ligand 2)*</li> <li>15. PD-1 (Programmed cell death protein 1)*</li> <li>16. TIM-3 (T-cell immunoglobulin and mucindomain containing-3) *</li> <li>17. TLR-2 (Toll like receptor 2) *</li> </ol> | <ol style="list-style-type: none"> <li>1. 4-1BBL/TNFSF9 #</li> <li>2. 5'-NT/CD73 (5'-nucleotidase),</li> <li>3. APRIL (TNFSF13) #</li> <li>4. Arginase-1</li> <li>5. B7-H2/ICOSL (Inducible T cell costimulator ligand* 6. B7-H3/CD276*</li> <li>7. B7-H4/VTCN1 (V-set domain-containing T-cell activation inhibitor 1)*</li> <li>8. B7-H5/VISTA (V-set immunoregulatory receptor)*</li> <li>9. B7-H6 (Natural killer cell cytotoxicity receptor 3 ligand) *</li> <li>10. BAFF/BLyS (TNFSF13B) #</li> <li>11. CD25/IL-2R<math>\alpha</math> (Interleukin-2 receptor alpha)</li> <li>12. CD30/TNFRSF8#</li> <li>13. CD40L (CD40 ligand) #</li> <li>14. CD137/4-1BB (TNFRSF9) #</li> <li>15. CD226/DNAM-1 (DNAX accessory molecule 1)*</li> <li>16. E-Cadherin</li> <li>17. FGL1/Hepassocin (Fibrinogen-like protein 1)</li> <li>18. Galectin-1 (Gal-1)*</li> <li>19. Galectin-3 (Gal-3)*,</li> <li>20. Granulysin*</li> <li>21. Granzyme B*</li> <li>22. IDO1 (Indoleamine 2,3-dioxygenase 1)</li> <li>23. MICA (MHC class I polypeptide-related sequence A)*</li> <li>24. MICB (MHC class I polypeptide-related sequence B)*</li> <li>25. Nectin-2 (PVRL2, CD112)*</li> <li>26. Nectin-4 (PVRL4)*</li> <li>27. OX40/CD134 (TNFRSF4) #</li> <li>28. Perforin*</li> <li>29. PVR/CD155 (Poliovirus receptor cell adhesion molecule) *</li> <li>30. Siglec-7 (Sialic acid-binding Ig-like lectin 7, CD328)*</li> <li>31. Siglec-9 (Sialic acid-binding Ig-like lectin 9, CD329)*</li> </ol> |
| <p>#TNF superfamily and *Ig superfamily molecules as some additional molecules were determined using Millipore Milliplex Checkpoint Protein Panel 1 and Panel 2 with the Flexmap3D instrument. Biomarker concentrations were determined based on standard curves and expressed in pg/ml.</p>                                                                                                                                                                                                                                                                                                                                                                                                                                                                                                                                                                                                                                                                                                                |                                                                                                                                                                                                                                                                                                                                                                                                                                                                                                                                                                                                                                                                                                                                                                                                                                                                                                                                                                                                                                                                                                                                                                                                                                                                                                                                                                                                                                                                                         |

**Figure Legends for Supplementary Figures:**

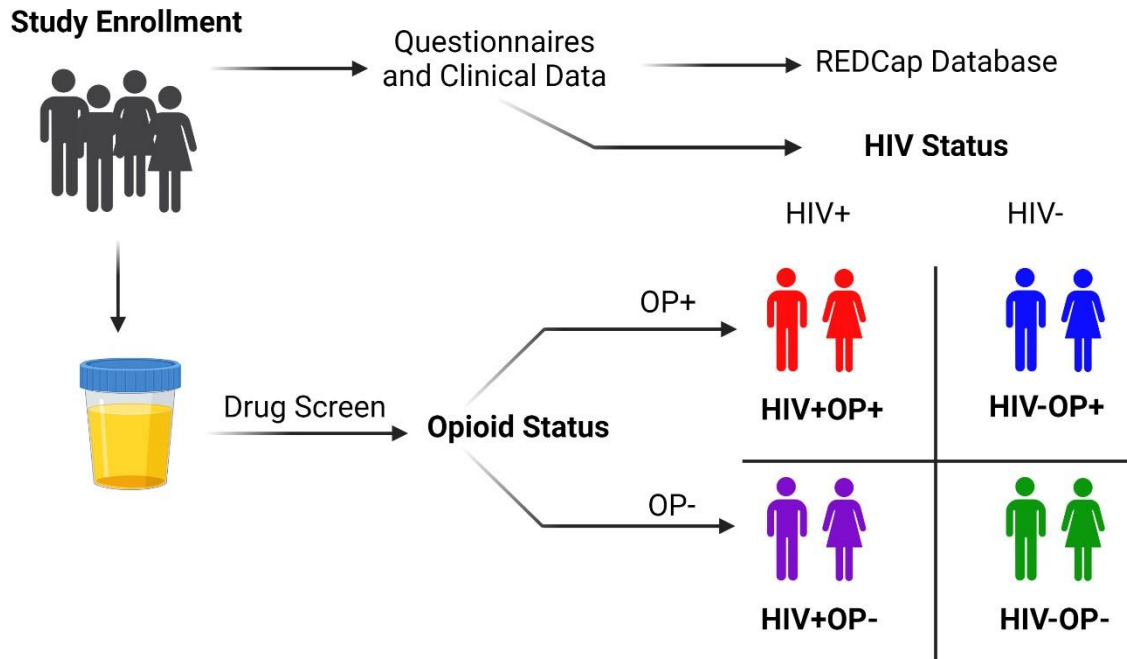

**Figure S1: Opioid Immunity Study (OPIS) Study Design.** (A) Four groups are recruited based on HIV status and opioid use status. Urine samples are collected to test opioid and polydrug use. Red represents HIV+OP+, Blue represents HIV-OP+, Purple represents HIV+OP-, and Green represents HIV-OP-. Participants of all genders are recruited into the study.

Design Figure was created with BioRender.com.

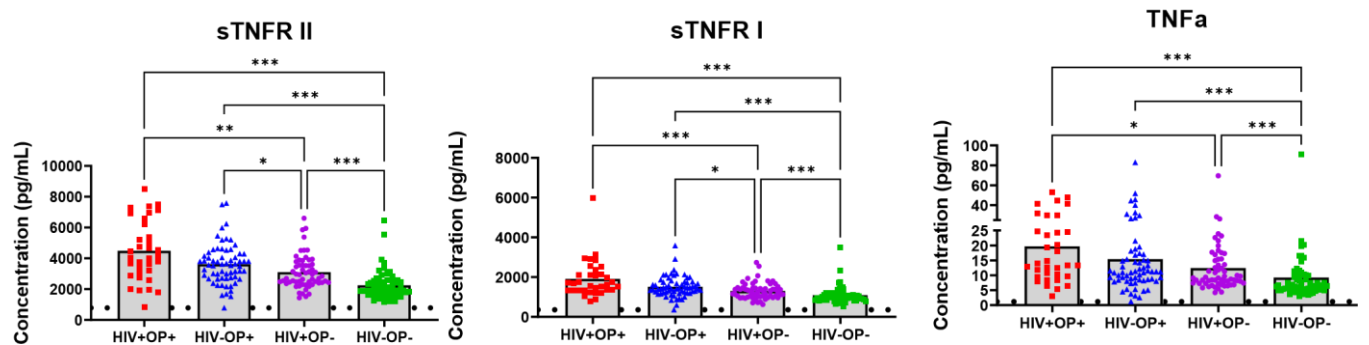

**Figure S2:** Raw Baseline Concentration of sTNFR II, sTNFR I and TNFa. Individual box plots with mean and SEM confidence intervals of sTNFR II, sTNFR I and TNFa. Red represents HIV+OP+, Blue represents HIV-OP+, Purple represents HIV+OP-, and Green represents HIV-OP-. Nonparametric Kruskal Wallis test was corrected for multiple comparisons by controlling the FDR (original FDR method of Benjamini and Hochberg). Adjusted p-values: \*\*\*\*p<0.0001, \*\*\*p<0.001, \*\*p<0.01, \*p<0.05. The limit of detection is indicated with a dotted line.

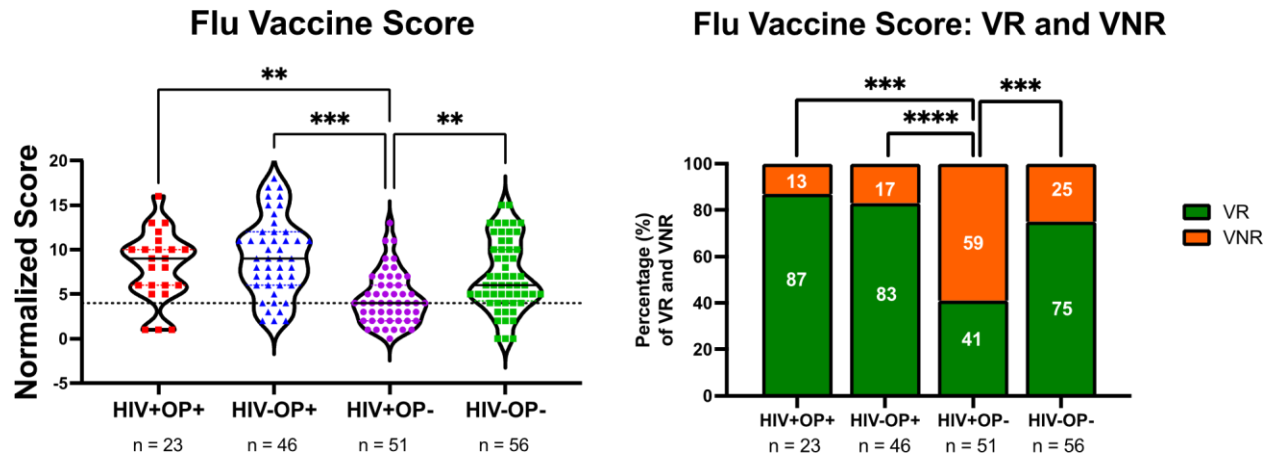

**Figure S3:** Violin dot plots with the median expression of normalized flu vaccine score. (Non-parametric Kruskal-Wallis test with Dunn's multiple group comparisons. \*\* $p < 0.01$ , \*\*\* $p < 0.001$ ). Stacked bar plots displaying percentages of vaccine responders (VR) and vaccine non-responders (VNR) based on normalized flu vaccine scores. Vaccine responders are defined by a vaccine score greater than 4, while people with a vaccine score of less than or equal to 4 were classified as vaccine non-responders (Non-parametric Chi-Square test with Fisher's Exact Test comparison between two groups. \*\* $p < 0.01$ , \*\*\* $p < 0.001$ , \*\*\*\* $p < 0.0001$ ).
